# Supplementary material
Source: Springer Nature journal article supplement (https://www.springermedizin.de/resource/supplementary/12899_2010_174_MOESM3_ESM.pdf/9514638)

### Soleus 20 Hz

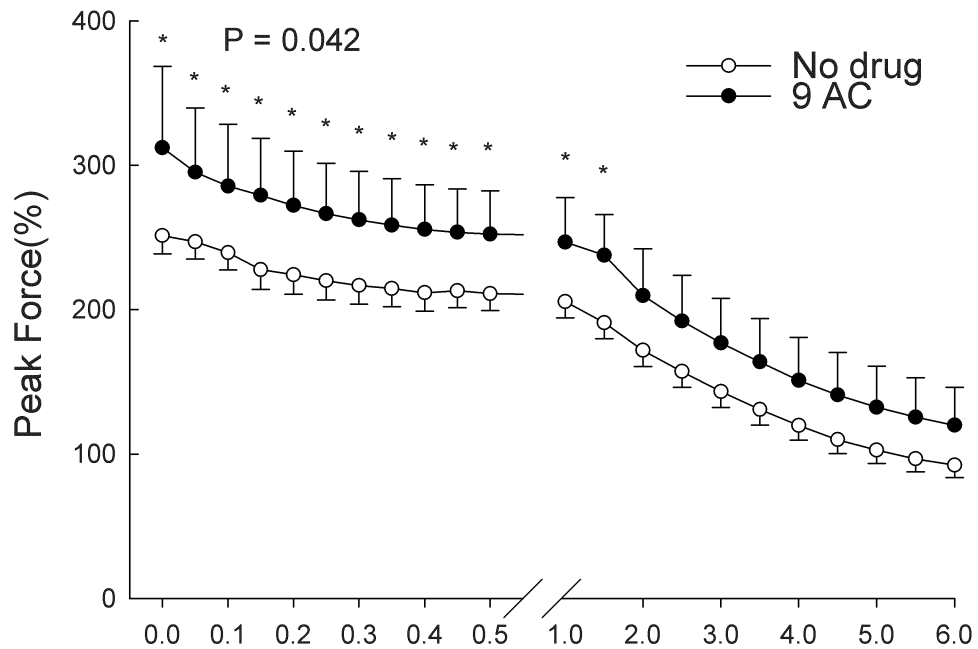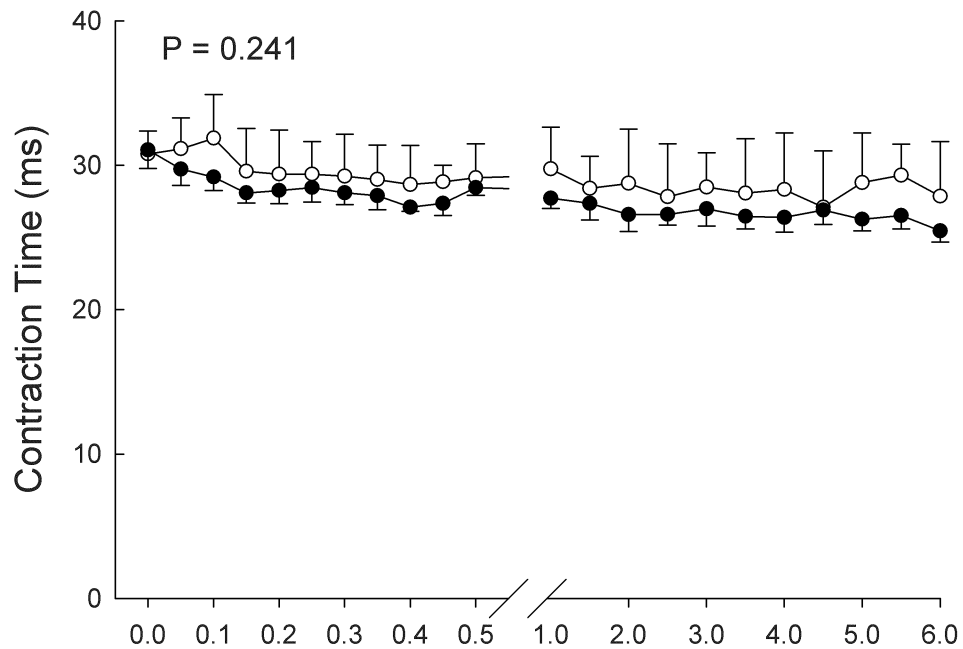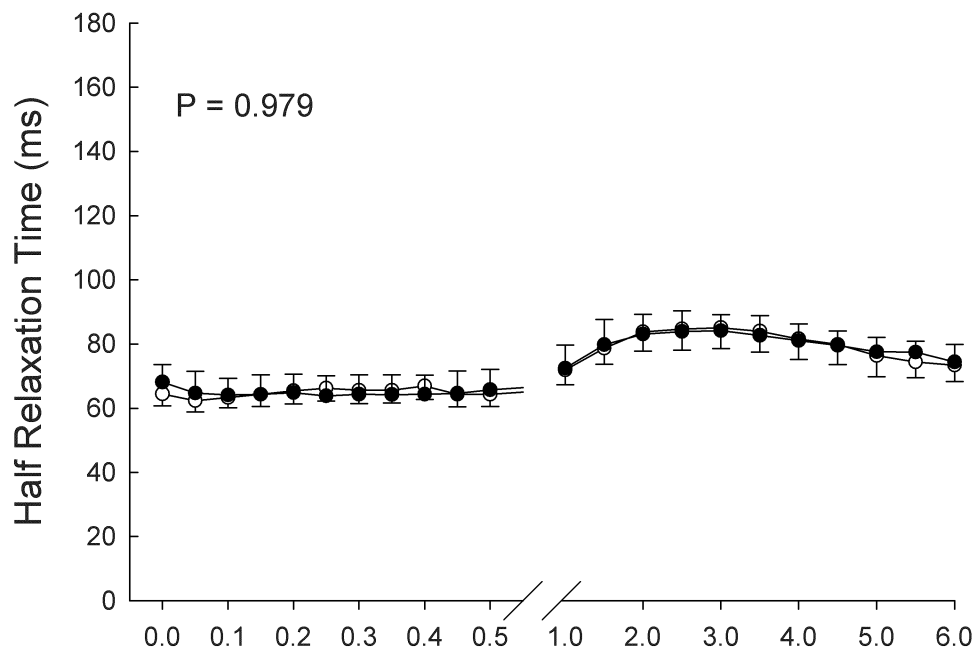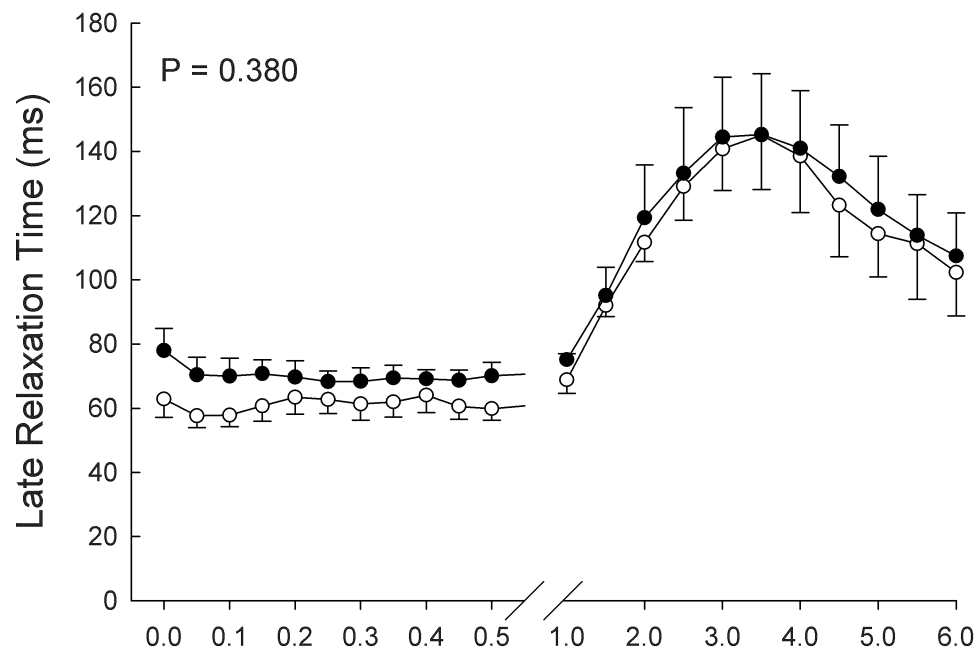

Time (min)

Supplement: MOESM3 [file 9514638]
